# Supplementary material
Source: PubMed Central journal article supplement (PMC6800996)
Supplement: NIHMS1053940-supplement-1.pdf [file NIHMS1053940-supplement-1.pdf]

1 **Supplemental Information: Male accessory gland molecules inhibit harmonic**  
 2 **convergence in the mosquito *Aedes aegypti***

3 Garrett P. League, Lindsay L. Baxter, Mariana F. Wolfner, and Laura C. Harrington

4

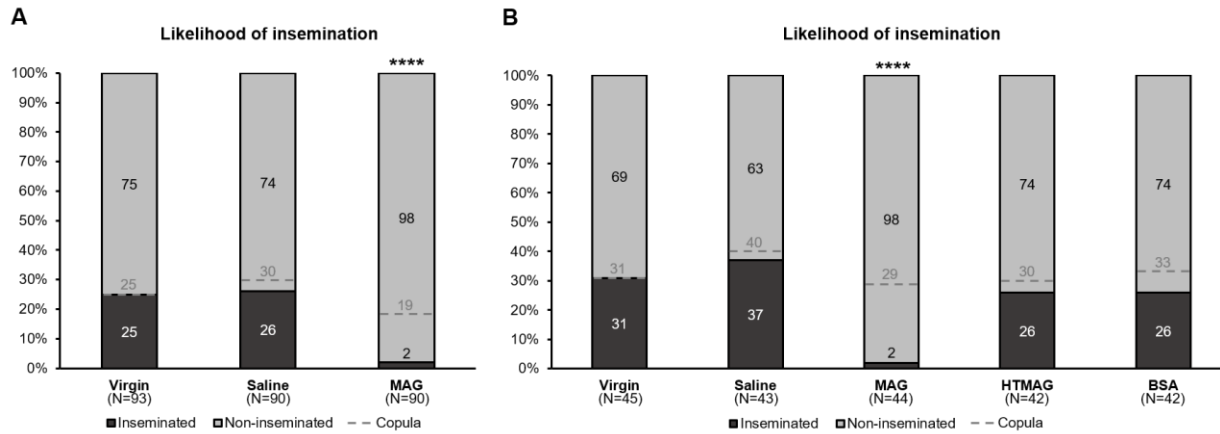

5

6 **Figure S1. MAG-induced inhibition of harmonic convergence correlates with**

7 **lower insemination rates.** Treatment had a significant effect on the proportion of

8 apparent copulas that resulted in female insemination ( $\chi^2$ : treatment,  $P < 0.05$  for both

9 sets of replicates). (A) MAG-injected females (2%;  $N = 90$ ) were successfully inseminated

10 less often compared to virgin (25%;  $N = 93$ ) and saline-injected (26%;  $N = 90$ ) control

11 females. (B) Heat-treated MAG (HTMAG; 26%;  $N = 42$ ) and BSA-injected (26%;  $N = 42$ )

12 females did not display lower insemination rates compared to virgin (31%;  $N = 45$ ) and

13 saline-injected (37%;  $N = 43$ ) control females, but were more likely to be inseminated

14 than MAG-injected (2%;  $N = 44$ ) females. Treatment did not have a significant effect on

15 apparent copula formation ( $N = 89-93$  and  $N = 43-45$  pairs per group for replicates 1-7

16 and 4-7, respectively;  $\chi^2$ : treatment,  $P \geq 0.124$  for both sets of replicates) and copula

17 formation did not correlate with HC ( $\chi^2$ :  $P \geq 0.268$  for both sets of replicates). Mated

18 groups were excluded from the mating outcome analyses because they were already

19 100% inseminated prior to testing. Dashed gray lines represent the percent of apparent

20 copulas formed in each group based on our visual analysis. Asterisks denote

21 significance for insemination data compared to the saline control group. \*\*\*\*  $P \leq 0.0001$ .

22

| Treatment | Converging sex |    |       |    |       |    |         |    | Converging harmonics |      |        |    |       |   |        |      |
|-----------|----------------|----|-------|----|-------|----|---------|----|----------------------|------|--------|----|-------|---|--------|------|
|           | M              |    | F     |    | B     |    | U       |    | 2:1                  |      | 3:2    |    | 4:3   |   | 5:3    |      |
|           | Ratio          | %  | Ratio | %  | Ratio | %  | Ratio   | %  | Ratio                | %    | Ratio  | %  | Ratio | % | Ratio  | %    |
| Virgin    | 15/42          | 36 | 1/42  | 2  | 2/42  | 5  | 24/42   | 57 | 18/42                | 43   | 9/42   | 21 | 0/42  | 0 | 15/42  | 36   |
| Saline    | 12/40          | 30 | -     | -  | 4/40  | 10 | 24/40   | 60 | 19/40                | 47.5 | 6/40   | 15 | 2/40  | 5 | 13/40  | 32.5 |
| Mated     | 5/20           | 25 | -     | -  | -     | -  | 15/20   | 75 | 10/20                | 50   | 2/20   | 10 | 0/20  | 0 | 8/20   | 40   |
| MAG       | 5/18           | 28 | -     | -  | -     | -  | 13/18   | 72 | 9/18                 | 50   | 4/18   | 22 | 0/18  | 0 | 5/18   | 28   |
| HTMAG     | 2/19           | 11 | -     | -  | -     | -  | 17/19   | 89 | 10/19                | 53   | 2/19   | 10 | 1/19  | 5 | 6/19   | 32   |
| BSA       | 5/20           | 25 | -     | -  | -     | -  | 15/20   | 75 | 14/20                | 70   | 2/20   | 10 | 1/20  | 5 | 3/20   | 15   |
| Total     | 44/159         | 28 | 1/159 | <1 | 6/159 | 4  | 108/159 | 68 | 80/159               | 50   | 25/159 | 16 | 4/159 | 3 | 50/159 | 31   |

23

24 **Table S1. Harmonic convergence is most often achieved by males at the female**

25 **second and male first harmonics.** Converging sex and converging harmonics data

26 presented for each treatment group. Most often the converging sex shifted its flight

27 tones too early in an interaction to determine which sex's flight tone modulations

28 achieved HC (U, unknown: 68% of converging pairs). However, when either sex's flight

29 tone modulations resulted in HC in a detectable manner, HC was almost always  
30 achieved by the male alone (M, male: 28%) rather than the female alone (F, female:  
31 <1%) or both sexes (B, both: 4%). The sex responsible for convergence did not vary  
32 between treatment groups (N=18–42 and N=9–21 per group for trials 1–7 and 4–7,  
33 respectively;  $\chi^2$ :  $P \geq 0.601$  for both sets of replicates). Convergence occurred most often  
34 by the merging of the female second and male first harmonics (2:1; 50%) and at similar  
35 harmonic combinations across all replicates (N=18–42 and N=9–21 per group for  
36 replicates 1–7 and 4–7, respectively;  $\chi^2$ :  $P \geq 0.731$  for both sets of replicates). Data for  
37 each treatment group were pooled across replicates 1–7 for trials including virgin,  
38 saline, mated, and MAG groups or across replicates 4–7 for trials containing additional  
39 HTMAG and BSA groups. M, male; F, female; B, both; U, unknown. 2:1: Female second  
40 and male first harmonics; 3:2: Female third and male second harmonics; 4:3: Female  
41 fourth and male third harmonics; 5:3: Female fifth and male third harmonics.

42

### 43 **Supplemental Experimental Procedures**

44

#### 45 *Mosquito rearing and maintenance*

46 *Aedes aegypti* mosquitoes (Thai strain) originated from collections in Bangkok,  
47 Thailand (15°72'N, 101°75'E) and have been maintained in colony with annual  
48 supplementation of F<sub>1</sub> eggs since 2009. Mosquitoes were reared in an environmental  
49 chamber as described previously [1] to obtain uniform, medium-body-sized adults (male  
50 wing lengths: 2.21 ± 0.08 mm; females: 2.87 ± 0.12 mm) [2]. Briefly, eggs were vacuum  
51 hatched and 200 larvae were placed in plastic trays containing 1 L of distilled water and  
52 4 fish food pellets the following day (Hikari Cichlid Gold, Hayward, CA, USA). Male and  
53 female pupae were visually separated by size and females were isolated in test tubes to  
54 confirm their sex and ensure their virgin status prior to transfer into 8 L plastic buckets,  
55 where they fed on a 10% sucrose solution *ad libitum*.

56

#### 57 *MAG extract preparation, mosquito injections, and antennae removal*

58 A total of fifty MAGs were dissected from males at two-to-three days post-  
59 eclosion and pooled at a 1:1 ratio in a 50  $\mu$ l solution (one-quarter MAG-equivalent  
60 injections) of modified phosphate-buffered saline (PBS; pH 6.9) or at a 2:1 ratio in 25  $\mu$ l  
61 PBS (for one-half MAG-equivalent injections). Standard injections were performed at  
62 the one-quarter MAG-equivalent dose as this concentration is effective for inducing a  
63 complete refractory mating response in *Ae. aegypti* [3] and corresponds approximately  
64 to a single male ejaculate [4]. The buffer was comprised of 133.58 mM sodium chloride  
65 (Fisher Scientific, Pittsburgh, PA, USA), 2.63 mM potassium chloride (Fisher), 9.75 mM  
66 sodium phosphate dibasic (Fisher), 3 mM potassium phosphate monobasic (Fisher),  
67 and 2 mM calcium chloride dihydrate (MilliporeSigma, St. Louis, Missouri, USA) in Milli-  
68 Q water (MilliporeSigma). Buffer was filtered through a Durapore Membrane Filter (0.22  
69  $\mu$ m pore size; MilliporeSigma). Dissected MAGs were then homogenized, sonicated for  
70 30 s, and centrifuged at 4 °C and 14,500 rcf for 15 min, and the resulting supernatant  
71 was used for MAG injections.

72 Injections were performed on female mosquitoes at two-to-three days post-  
73 eclosion using a Nanoject III Programmable Nanoliter Injector (Drummond Scientific  
74 Company, Broomall, PA, USA) and finely pulled glass capillary needles to inject liquids

75 into the lateral thorax at the anepisternal cleft. MAG contents were injected at a one-  
76 quarter MAG-equivalent concentration, or 250 nl injections of the 1 MAG/ $\mu$ l PBS  
77 solution, and in the case of the MAG dosage experiment, at one-half MAG-equivalent  
78 concentration, or 250 nl of 2 MAG/ $\mu$ l PBS solution. For injection of heat-treated MAG  
79 contents, MAG homogenate was heated for 5 min at 95 °C in a Bio-Rad C1000 Thermal  
80 Cycler (Bio-Rad Laboratories, Hercules, CA, USA) [1]. For experiments comparing BSA  
81 and MAG injections, protein concentrations were verified for equivalency using a Pierce  
82 BCA Protein Assay Kit (Thermo Fisher Scientific, Waltham, MA, USA). For BSA  
83 injections, we injected BSA protein powder dissolved in PBS at approximately 1  $\mu$ g/ $\mu$ l  
84 concentration, as this is close to the average one-quarter MAG-equivalent homogenate  
85 concentration of  $1.03 \pm 0.27$  ug/ $\mu$ l (N=8 samples). To control for potential needle injury  
86 effects, we included a cohort of females injected with 250 nl of PBS alone (saline  
87 treatment).

88 All injected females as well as non-injected controls, including mated females  
89 (males added at a 1:1 male to female ratio), were placed in 2 L wax-lined cardboard  
90 recovery cages and transferred to an environmental chamber under the conditions  
91 referenced above. Mosquitoes were held for two days prior to audio recordings and  
92 were provided with 10% sugar-soaked cotton pads. Males were removed from the  
93 mated group cage 24 h prior to recordings.

94

#### 95 *Audio recording and analysis of pre-copulatory flight interactions*

96 Females were tethered using nail glue (L.A. Colors, Ontario, CA, USA or similar  
97 product) at the dorsal mesothorax by a human hair attached to an insect pin [5]. Similar  
98 to previously described recording methods [7], tethered females were placed  
99 approximately 3 cm away from either a particle velocity microphone or an  
100 omnidirectional microphone (NR-21358 and FG-23329-C05, respectively; Knowles,  
101 Itasca, IL, USA) attached to a custom amplifier [6], in a 20 x 14 x 10 cm plastic  
102 recording arena. Upon initiation of female flight, audio recordings using Audacity 2.1.3  
103 and 2.2.2 software (<https://www.audacityteam.org/>, accessed May 23, 2017 and  
104 updated April 13, 2018) were initiated and three virgin males were added into the arena.  
105 The recording was stopped after the first male-female pre-copulatory flight interaction  
106 lasting > 1 s was recorded and the female either persistently rejected or formed an  
107 apparent mating copula with the male. A flight interaction was defined as a male  
108 approaching a female in flight and rapidly modulating his flight tones in an attempt to  
109 secure, harmonically converge, and mate with the female. To be considered a copula,  
110 the couple had to be connected for > 8 s, as this is the minimum amount of time  
111 necessary for insemination to occur [8,9]. After audio recordings, female spermathecae  
112 were dissected to verify insemination status. If an apparent copula led to successful  
113 insemination, the copula was considered a mating copula; if not, it was considered a  
114 pseudocopula [10,11]. All recordings were performed at  $28.04 \pm 1.75$  °C and  $49.63 \pm$   
115  $6.96\%$  RH.

116 To determine whether the male and female wing beat harmonics converged  
117 during flight interactions, audio files were analyzed as spectrograms using Raven Pro  
118 1.5 software (Bioacoustics Research Program, Cornell Laboratory of Ornithology,  
119 Ithaca, NY, USA). Potential instances of convergence were systematically tested at all  
120 harmonic combinations below 3,000 Hz, including the female second and male first

121 harmonics (2:1), the female third and male second harmonics (3:2), the female fourth  
122 and male third harmonics (4:3), the female fifth and male third harmonics (5:3), and the  
123 female fifth and male fourth harmonics (5:4). Because convergence was never detected  
124 at 5:4, this harmonic combination was excluded in all analyses. To be considered a true  
125 instance of convergence, male and female harmonics had to be within 5 Hz of each  
126 other for at least 1 s [12]. The sex responsible for HC was defined as the individual,  
127 male or female (or both), who shifted his or her flight tone during a courtship interaction  
128 to achieve convergence. If HC occurred too early in an interaction to determine which  
129 sex's flight tone shift achieved convergence, the sex responsible for convergence was  
130 deemed unknown. Average flight tone frequencies during male-female interactions  
131 across treatment groups were similar for most replicates (N=90–93 and N=43–45 per  
132 group for replicates 1–7 and 4–7, respectively; two-way ANOVA: treatment,  $P > 0.05$  for  
133 nine out of eleven replicates), with males flying at a fundamental frequency of  $841.82 \pm$   
134  $56.59$  Hz and females flying at  $476.81 \pm 36.11$  Hz across all treatment groups and  
135 replicates. This, together with the converging harmonics data (Figure S1), suggests that  
136 the differences in ability to induce male convergence between mated or MAG-injected  
137 females and virgin females are caused by subtle (that is,  $\geq 5$  Hz tone shifts), rather than  
138 drastic changes in courtship flight tone frequencies.

139

#### 140 *Statistical analysis*

141 All data were analyzed using IBM SPSS Statistics software (SPSS version 24,  
142 IBM Corp., Armonk, NY). For all *post hoc* pairwise comparisons, significant differences  
143 were identified only for those comparisons with P values that were less than 0.05 and  
144 were less than their Benjamini-Hochberg critical values with a false discovery rate of  
145 0.25 [13–15]. All means are presented  $\pm$  standard deviation (SD). HC, copulation, and  
146 insemination data were analyzed using a binary logistic generalized linear model, with  
147 treatment and replicate effects tested using Wald Chi-Square ( $\chi^2$ ) test. When comparing  
148 proportions of insemination events, mated groups (which had 100% inseminated  
149 outcomes) were excluded from the analyses to run the binary logistic model, as the 95%  
150 confidence intervals as calculated by  $3/N$  (where N = the total number of outcomes  
151 across all replicates) for these groups were  $< 0.1$  [16]. Fundamental flight tone data were  
152 analyzed with a two-way ANOVA test and copulation-convergence correlation,  
153 converging harmonics, and converging sex data were analyzed using a  $\chi^2$  test.

154 For HC data, after testing for replicate effects and finding none ( $P = 0.810$ ), we  
155 combined the seven replicate experiments conducted with virgin, saline, mated, and  
156 MAG groups. Four of the seven experiments also contained additional heat-treated  
157 MAG and BSA controls and were tested for replicate effects ( $P = 0.362$ ), combined into a  
158 single analysis, and analyzed separately. Data from all experiments on copulation and  
159 insemination rates ( $P > 0.05$  for three out of four sets of replicates), fundamental flight  
160 tone frequency ( $P > 0.05$  for nine out of eleven replicates), as well as converging  
161 harmonics and converging sex data ( $P > 0.05$  for all twenty-two replicates), were likewise  
162 combined into the aforementioned replicate groupings to ensure robust sample sizes in  
163 all analyses.

164

165

166

167 **Supplemental References**

- 168 1. Villarreal, S.M., Pitcher, S., Helinski, M.E.H., Johnson, L., Wolfner, M.F., and  
169 Harrington, L.C. (2018). Male contributions during mating increase female survival  
170 in the disease vector mosquito *Aedes aegypti*. *J. Insect Physiol.* 108, 1–9.
- 171 2. Helinski, M.E.H., and Harrington, L.C. (2011). Male Mating History and Body Size  
172 Influence Female Fecundity and Longevity of the Dengue Vector *Aedes aegypti*.  
173 *J. Med. Entomol.* 48, 202–211.
- 174 3. Helinski, M.E.H., Deewatthanawong, P., Sirot, L.K., Wolfner, M.F., and  
175 Harrington, L.C. (2012). Duration and dose-dependency of female sexual  
176 receptivity responses to seminal fluid proteins in *Aedes albopictus* and *Ae.*  
177 *aegypti* mosquitoes. *J. Insect Physiol.* 58, 1307–1313.
- 178 4. Alfonso-Parra, C., Avila, F.W., Deewatthanawong, P., Sirot, L.K., Wolfner, M.F.,  
179 and Harrington, L.C. (2014). Synthesis, depletion and cell-type expression of a  
180 protein from the male accessory glands of the dengue vector mosquito *Aedes*  
181 *aegypti*. *J. Insect Physiol.* 70, 117–124.
- 182 5. Cator, L.J., Ng'Habi, K.R., Hoy, R.R., and Harrington, L.C. (2010). Sizing up a  
183 mate: variation in production and response to acoustic signals in *Anopheles*  
184 *gambiae*. *Behav. Ecol.* 21, 1033–1039.
- 185 6. Arthur, B.J., Sunayama-Morita, T., Coen, P., Murthy, M., and Stern, D.L. (2013).  
186 Multi-channel acoustic recording and automated analysis of *Drosophila* courtship  
187 songs. *BMC Biol.* 11, 11.
- 188 7. Villarreal, S.M., Winokur, O., and Harrington, L. (2017). The Impact of  
189 Temperature and Body Size on Fundamental Flight Tone Variation in the  
190 Mosquito Vector *Aedes aegypti* (Diptera: Culicidae): Implications for Acoustic  
191 Lures. *J. Med. Entomol.* 54, 1116–1121.
- 192 8. Ponlawat, A., and Harrington, L.C. (2009). Factors Associated with Male Mating  
193 Success of the Dengue Vector Mosquito, *Aedes aegypti*. *Am. J. Trop. Med. Hyg.*  
194 80, 395–400.
- 195 9. Degner, E.C., and Harrington, L.C. (2016). Polyandry Depends on Postmating  
196 Time Interval in the Dengue Vector *Aedes aegypti*. *Am. J. Trop. Med. Hyg.* 94,  
197 780–785.
- 198 10. Craig, G.B. (1967). Mosquitoes: Female monogamy induced by male accessory  
199 gland substance. *Science.* 156, 1499–1501.
- 200 11. Gwadz, R.W., Craig, G.B., and Hickey, W.A. (1971). Female sexual behavior as  
201 the mechanism rendering *Aedes aegypti* refractory to insemination. *Biol. Bull.*  
202 140, 201–214.
- 203 12. Cator, L.J., and Harrington, L.C. (2011). The harmonic convergence of fathers  
204 predicts the mating success of sons in *Aedes aegypti*. *Anim. Behav.* 84, 627–633.

- 205 13. Benjamini, Y., and Hochberg, Y. (1995). Controlling the False Discovery Rate: A  
206 Practical and Powerful Approach to Multiple Testing. *J. R. Stat. Soc. B.* 57, 289–  
207 300.
- 208 14. Benjamini, Y., and Yekutieli, D. (2001). The Control of the False Discovery Rate in  
209 Multiple Testing under Dependency. *Ann. Stat.* 29, 1165–1188.
- 210 15. McDonald, J.H. (2014). *Handbook of Biological Statistics, Third Edition*  
211 (Baltimore, MD: Sparky House Publishing).
- 212 16. van Belle, G. (2008). *Statistical Rules of Thumb, Second Edition* (Hoboken, NJ:  
213 John Wiley & Sons, Inc.).
- 214
